# Supplementary material
Source: publisher figshare collection journal article supplement (https://acs.figshare.com/ndownloader/files/4600537)
Supplement: Supplementary file 1 [file 4600537]

## Supporting Materials

# Elucidation of Structural Restraints for Phosphate Residues with Different Hydrogen Bonding and Ionization States

*J. Gajda<sup>1</sup>, S. Olejniczak<sup>1</sup>, I. Bryndal<sup>2</sup> and M. J. Potrzebowski<sup>1\*</sup>*

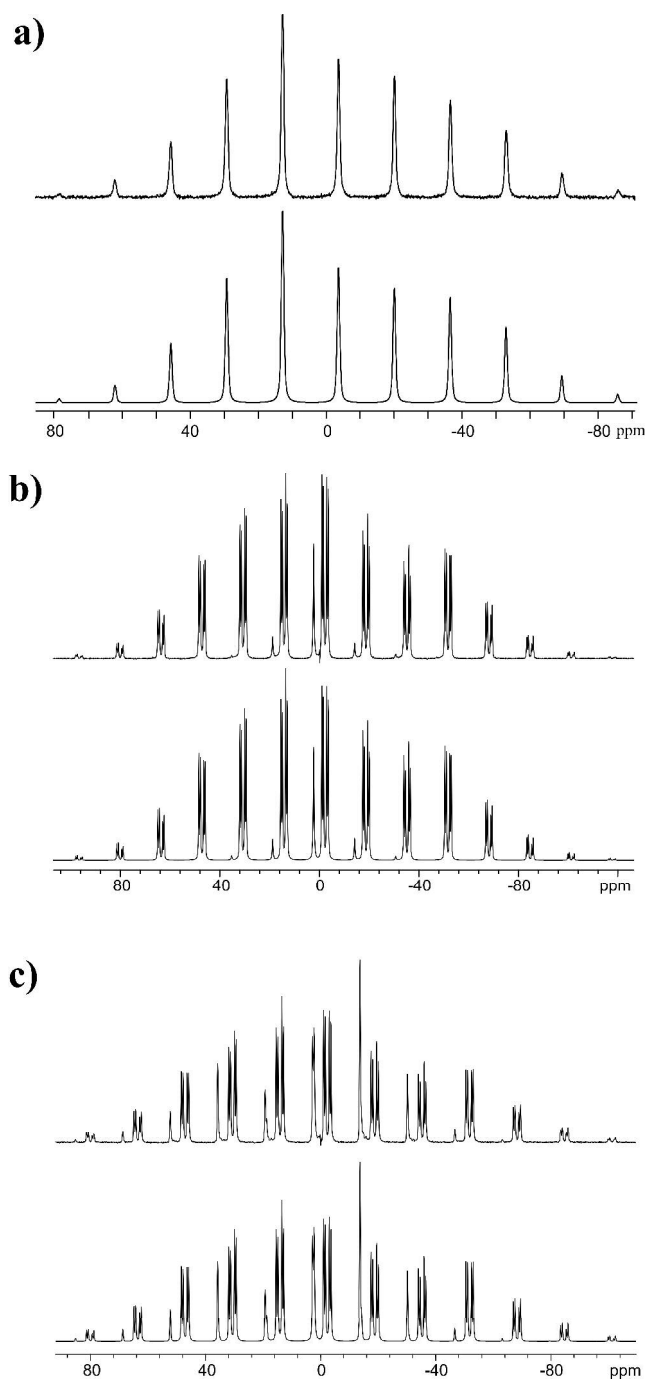

**Figure 1S.** The  $^{31}\text{P}$  CP/MAS spectra recorded with a spinning rate of 2kHz. a) O-phospho-L-threonine **1**, b) ammonium salt of O-phospho-L-threonine **2**, c) mixture of ammonium and diammonium salts of O-phospho-L-threonine **2** and **3**. Experimental spectra are presented on the top and the appropriate fitted spectra obtained employing the SIMPSON program (below).

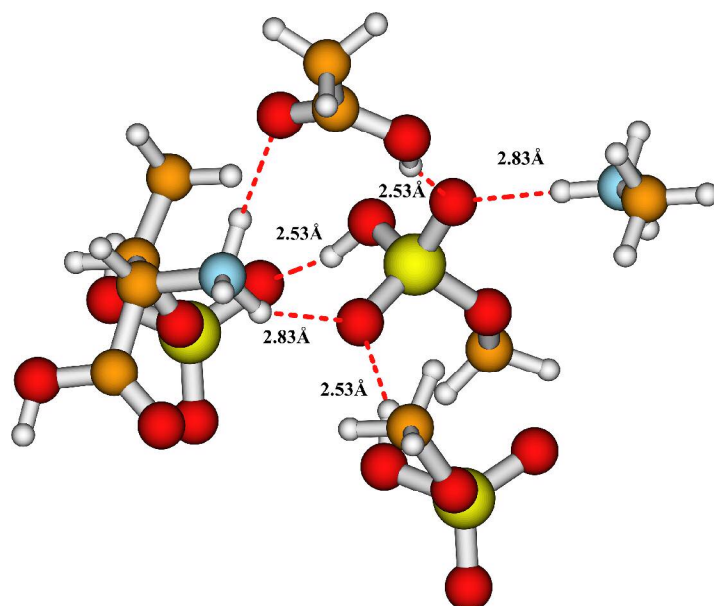

**Figure 2S.** The distances between heavy atoms involved in hydrogen bonds formed by the phosphate group (central molecule) of every independent molecule existing in one asymmetric unit of L-PThr are given in angstroms. Dotted lines show hydrogen bonds. For easier visualization, the threonine chains are replaced by CH<sub>3</sub> groups in this illustration.
